# Supplementary material for: Identification and validation of HSD11B2 as a biomarker for metastasis and prognosis of clear cell renal cell carcinoma
Source: Research Square preprint supplement (doi:10.21203/rs.3.rs-885592/v1), 2021-09-16
Supplement: Supplementary file 1 [file 2d017bca40b68034150a9d33.xlsx]

## Sheet: Sheet1
Supplementary Table S2. 20 overlapping differentially expressed genes in GSE105261, GSE25441, and GSE85258
LUM
COL5A1
REN
DCN
COL6A3
COL1A1
HSD11B2
FBLN1
PDGFRL
PRRX1
SCNN1A
MXRA5
KDELR3
SPINK13
SFRP4
POSTN
CTHRC1
FGG
PTGER3
EMX2
